# Supplementary material for: Influence of the head group on dynamics in surfactant intercalated graphite oxide
Source: Royal Society of Chemistry journal article supplement (doi:10.1039/c8ra08652d), 2019-01-01
Supplement: c8ra08652d1.pdf [file c8ra08652d1.pdf]

# **Influence of Head Group on Dynamic in Surfactant Intercalated Graphite Oxide**

Xiaoqian Ai<sup>a</sup>, Minmin Zhang<sup>a</sup>, Ye Yan<sup>a</sup>, Xiaoming Zhang<sup>a</sup>, Xiaoxiao

Cao<sup>a</sup>, Qiong Wang<sup>a</sup>, Ligang Ma<sup>b\*</sup>

*<sup>a</sup>College of Physics and Electronic Engineering, Jiangsu Second Normal University,*

*210013, China*

*<sup>b</sup>School of Electronic Engineering, Nanjing Xiaozhuang University, Nanjing 211171,*

*Nanjing China*

---

\*Corresponding author. *E-mail address*: maligang186@163.com (Ligang Ma)

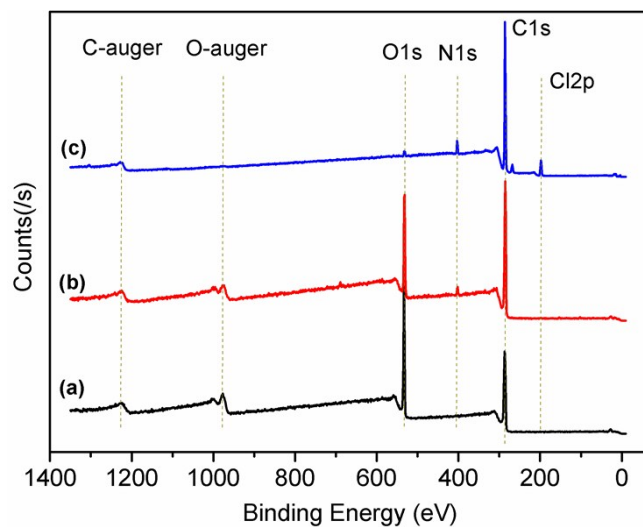

**Figure S1.** Survey scans XPS spectra of (a) GO, (b) C<sub>16</sub>TMA-GO and (c) C<sub>16</sub>TMACl.

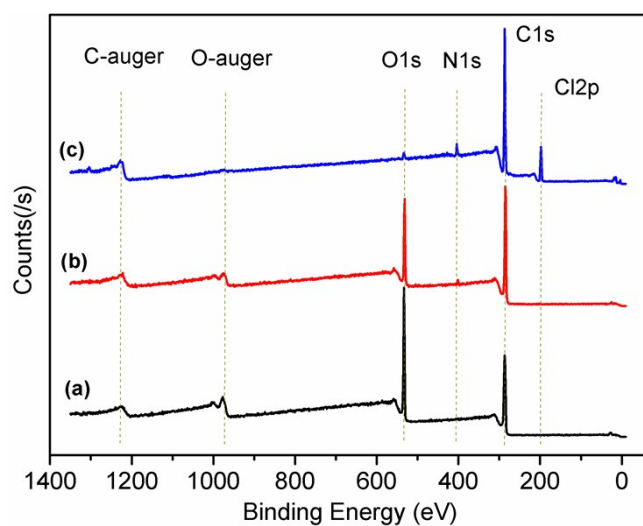

**Figure S2.** Survey scans XPS spectra of (a) GO, (b) C<sub>16</sub>Py-GO and (c) C<sub>16</sub>PyCl.

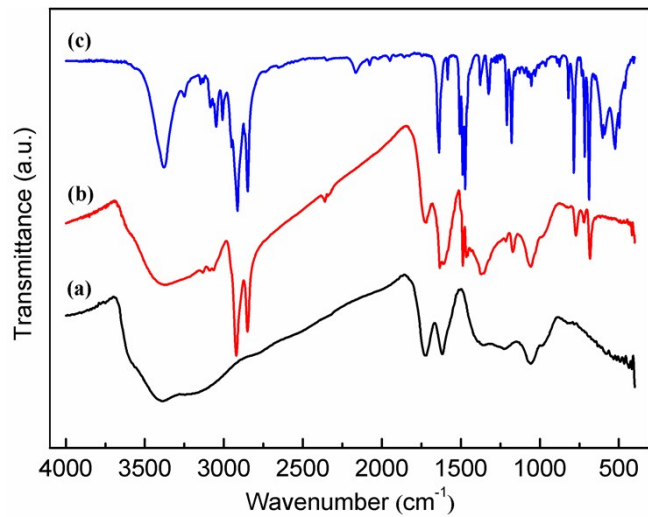

**Figure S3.** FTIR spectrum of (a) GO, (b) C<sub>16</sub>Py-GO and (c) C<sub>16</sub>PyCl.

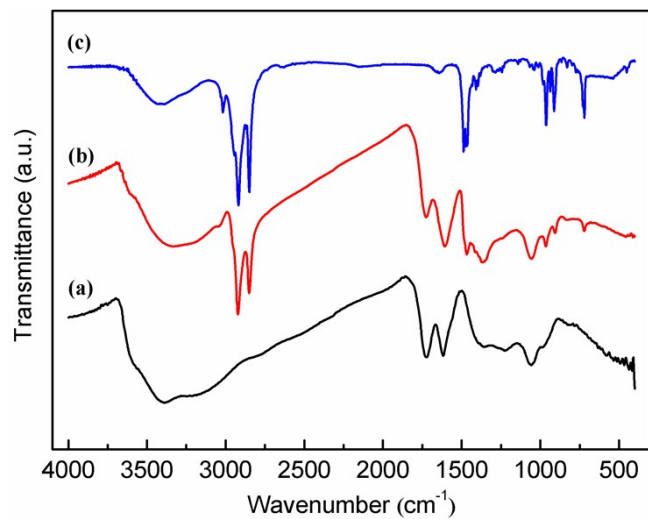

**Figure S4.** FTIR spectrum of (a) GO, (b) C<sub>16</sub>TMA-GO and (c) C<sub>16</sub>TMA Cl.
